# Supplementary material for: A novel Li2Mn2.9Ni0.9Co0.2O8spinel composite interweaved with carbon nanotube architecture as a lithium battery cathode
Source: Royal Society of Chemistry journal article supplement (doi:10.1039/c6ra04344e), 2016-01-01
Supplement: c6ra04344e1.pdf [file c6ra04344e1.pdf]

**Electronic Supplementary Information**

**A Novel  $\text{Li}_2\text{Mn}_{2.9}\text{Ni}_{0.9}\text{Co}_{0.2}\text{O}_8$  Spinel Composite  
Interweaved with Carbon Nanotube Architecture as  
Lithium Battery Cathode**

P. Remith and N. Kalaiselvi \*

Electrochemical Power Sources Division  
CSIR- Central Electrochemical Research Institute  
Karaikudi- 630 006, India  
E-mail: [kalaiselvicecri@gmail.com](mailto:kalaiselvicecri@gmail.com)

## Figures

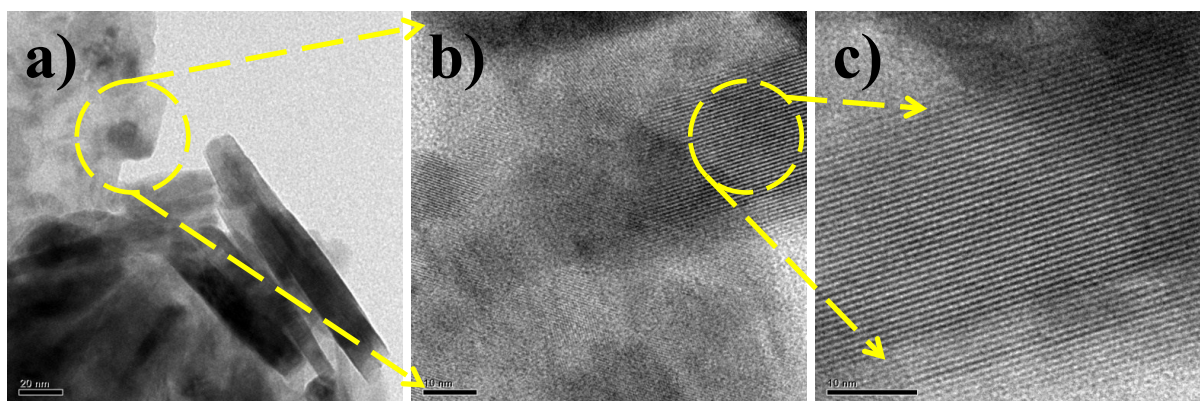

**Figure S1.** HRTEM images showing the lattice fringes of  $\text{Li}_2\text{Mn}_{2.9}\text{Ni}_{0.9}\text{Co}_{0.2}\text{O}_8$

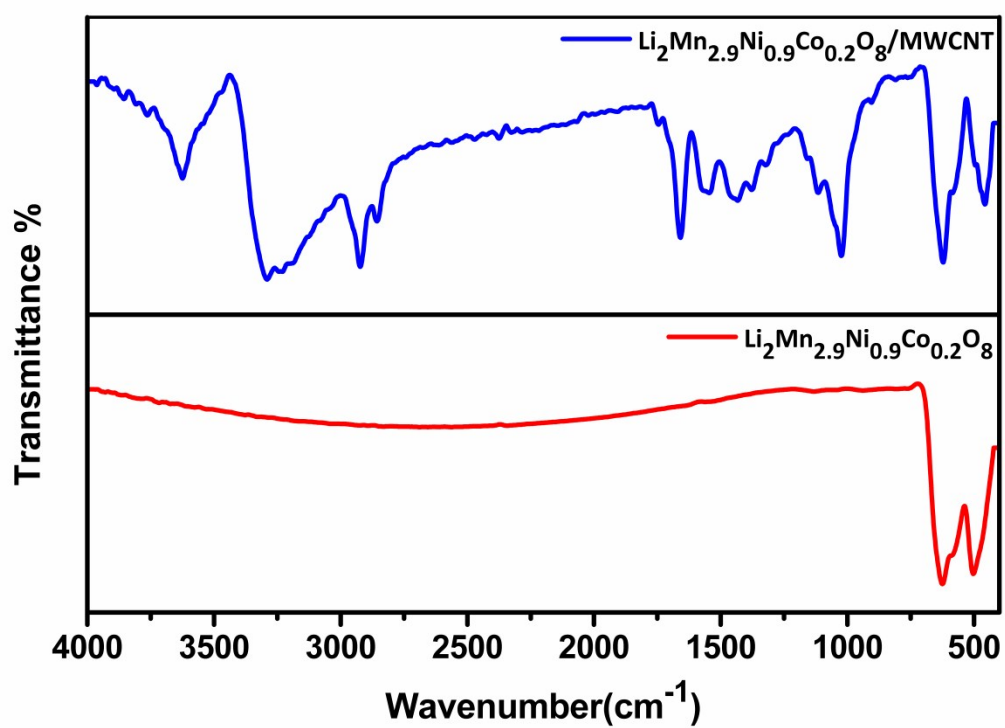

**Figure S2.** FTIR spectra of pristine  $\text{Li}_2\text{Mn}_{2.9}\text{Ni}_{0.9}\text{Co}_{0.2}\text{O}_8$  and the corresponding  $\text{Li}_2\text{Mn}_{2.9}\text{Ni}_{0.9}\text{Co}_{0.2}\text{O}_8/\text{MWCNT}$  composite

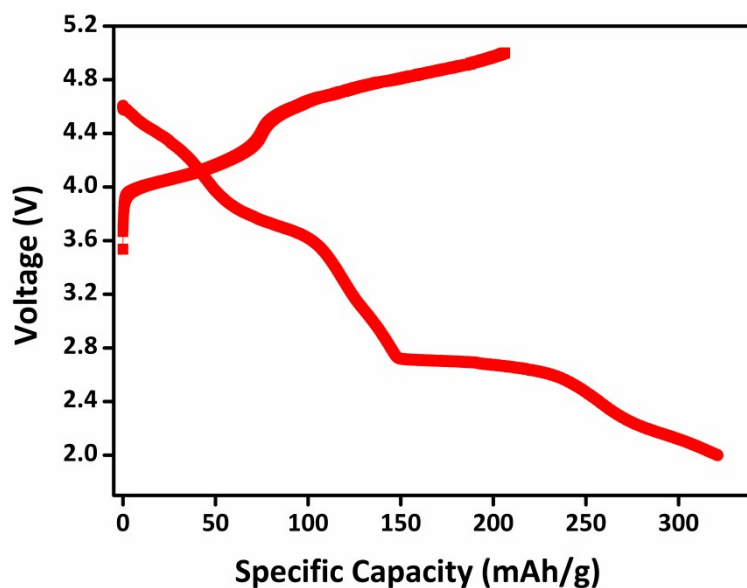

**Figure S3.** First cycle charge discharge voltage profile of  $\text{Li}_2\text{Mn}_{2.9}\text{Ni}_{0.9}\text{Co}_{0.2}\text{O}_8/\text{MWCNT}$  composite

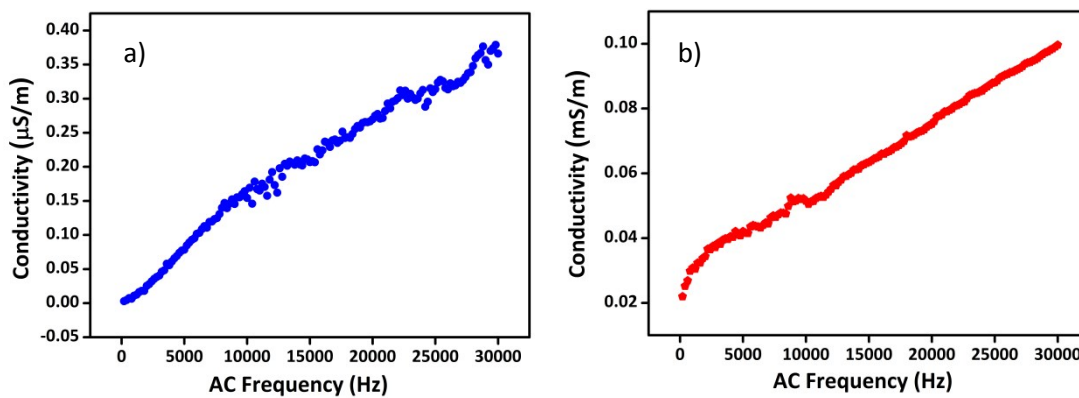

**Figure S4.** Room temperature conductivity versus AC frequency of a) pristine  $\text{Li}_2\text{Mn}_{2.9}\text{Ni}_{0.9}\text{Co}_{0.2}\text{O}_8$  and b)  $\text{Li}_2\text{Mn}_{2.9}\text{Ni}_{0.9}\text{Co}_{0.2}\text{O}_8/\text{MWCNT}$  composite
